# Supplementary material
Source: MDPI journal article supplement (https://www.mdpi.com/1424-2818/14/12/1100)

**Supplementary File S1.** Statistical analyses on photophore density ( $P_{De}$ ), scale density ( $S_{De}$ ) and, scale size ( $S_{Si}$ ). **(a)** Means of TL,  $P_{De}$ ,  $S_{De}$  and  $S_{Si}$  for every *S. aliae* development stages. **(b)** Pairwise comparisons using Dwass-Steele-Critchlow-Fligner all. Significant code: 0 ‘\*\*\*’; 0.001 ‘\*\*’; 0.01 ‘\*’; 0.05 ‘.’; 0.1 ‘.’; 1. **(c)** Dwass-Steele-Critchlow-Fligner all-pairs test for photophores density, scales density and, scales size. Letters indicate statistical different groups. **(d)** Linear relation between scales density and scales size.

**(a)**

| Development stages | Mean TL $\pm$ s.d. (mm) | Mean $P_{De} \pm$ s.d. (photophores $cm^{-2}$ ) | Mean $S_{De} \pm$ s.d. (scales $cm^{-2}$ ) | Mean $S_{Si} \pm$ s.d. (mm) |
|--------------------|-------------------------|-------------------------------------------------|--------------------------------------------|-----------------------------|
| Stage I            | 33.4 $\pm$ 6.9          | 0                                               | 0                                          | /                           |
| Stage II           | 52.8 $\pm$ 3.6          | 0                                               | 1353 $\pm$ 178                             | 0.1617 $\pm$ 0.0454         |
| Stage III          | 59.4 $\pm$ 2.9          | 1363 $\pm$ 418                                  | 1569 $\pm$ 270                             | 0.1579 $\pm$ 0.0482         |
| Stage IV           | 72.4 $\pm$ 3.8          | 2745 $\pm$ 464                                  | 1265 $\pm$ 282                             | 0.2013 $\pm$ 0.0582         |
| Stage V            | 81 $\pm$ 4.0            | 4020 $\pm$ 682                                  | 1225 $\pm$ 227                             | 0.2139 $\pm$ 0.0645         |
| Stage VI           | 98.4 $\pm$ 2.3          | 5873 $\pm$ 855                                  | 971 $\pm$ 174                              | 0.2111 $\pm$ 0.0517         |
| Stage VII (adult)  | 192.8 $\pm$ 24.9        | 7863 $\pm$ 636                                  | 1265 $\pm$ 199                             | 0.2079 $\pm$ 0.0488         |

TL, total length;  $P_{De}$ , photophores density;  $S_{De}$ , scales density;  $S_{Si}$ , scales relative size.  
Data are mean  $\pm$  s.d. (standard deviation)

**(b)**

| Stade | Scale density by development stage |          |           |          |          |          |
|-------|------------------------------------|----------|-----------|----------|----------|----------|
|       | I                                  | II       | III       | IV       | V        | VI       |
| II    | < 0.0001***                        | -        | -         | -        | -        | -        |
| III   | < 0.0001***                        | 0.29929  | -         | -        | -        | -        |
| IV    | < 0.0001***                        | 0.92832  | 0.12971   | -        | -        | -        |
| V     | < 0.0001***                        | 0.63592  | 0.02914.  | 0.99983  | -        | -        |
| VI    | < 0.0001***                        | 0.00101* | 0.00018** | 0.04857. | 0.04220. | -        |
| VII   | < 0.0001***                        | 0.91795  | 0.07528   | 0.99996  | 0.99557  | 0.01107• |

  

| Stade | Photophore density by development stage |             |             |             |             |           |
|-------|-----------------------------------------|-------------|-------------|-------------|-------------|-----------|
|       | I                                       | II          | III         | IV          | V           | VI        |
| II    | -                                       | -           | -           | -           | -           | -         |
| III   | < 0.0001***                             | < 0.0001*** | -           | -           | -           | -         |
| IV    | < 0.0001***                             | < 0.0001*** | < 0.0001*** | -           | -           | -         |
| V     | < 0.0001***                             | < 0.0001*** | < 0.0001*** | 0.00173*    | -           | -         |
| VI    | < 0.0001***                             | < 0.0001*** | < 0.0001*** | < 0.0001*** | < 0.0001*** | -         |
| VII   | < 0.0001***                             | < 0.0001*** | < 0.0001*** | < 0.0001*** | < 0.0001*** | 0.00018** |

  

| Stade | Relative scale length by development stage |             |             |      |      |      |
|-------|--------------------------------------------|-------------|-------------|------|------|------|
|       | I                                          | II          | III         | IV   | V    | VI   |
| II    | < 0.0001***                                | -           | -           | -    | -    | -    |
| III   | < 0.0001***                                | 1.00        | -           | -    | -    | -    |
| IV    | < 0.0001***                                | < 0.0001*** | < 0.0001*** | -    | -    | -    |
| V     | < 0.0001***                                | < 0.0001*** | < 0.0001*** | 0.79 | -    | -    |
| VI    | < 0.0001***                                | < 0.0001*** | < 0.0001*** | 0.96 | 1.00 | -    |
| VII   | < 0.0001***                                | < 0.0001*** | < 0.0001*** | 1.00 | 0.87 | 0.98 |

(c)

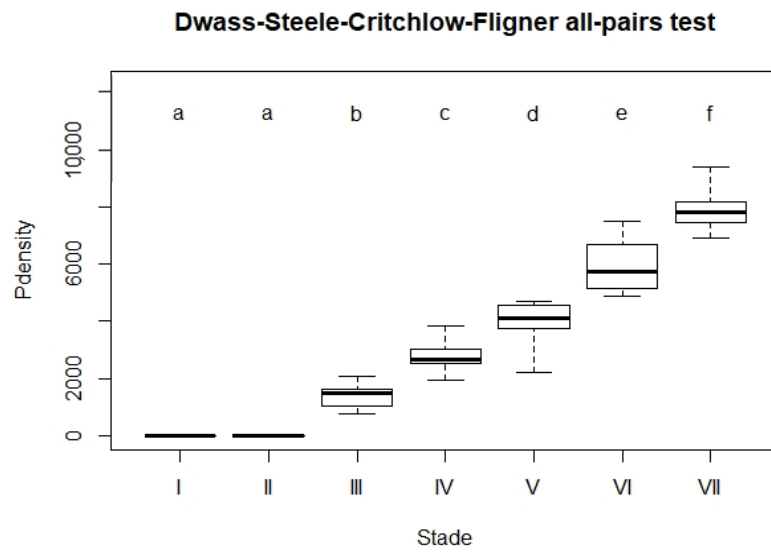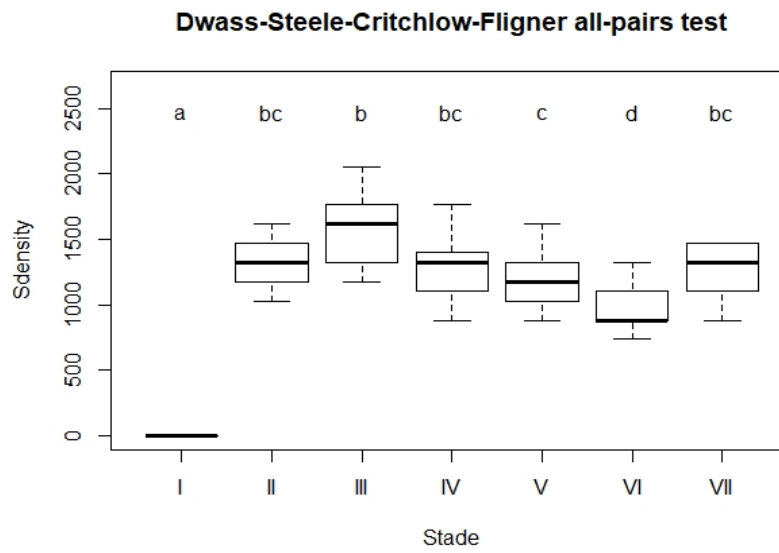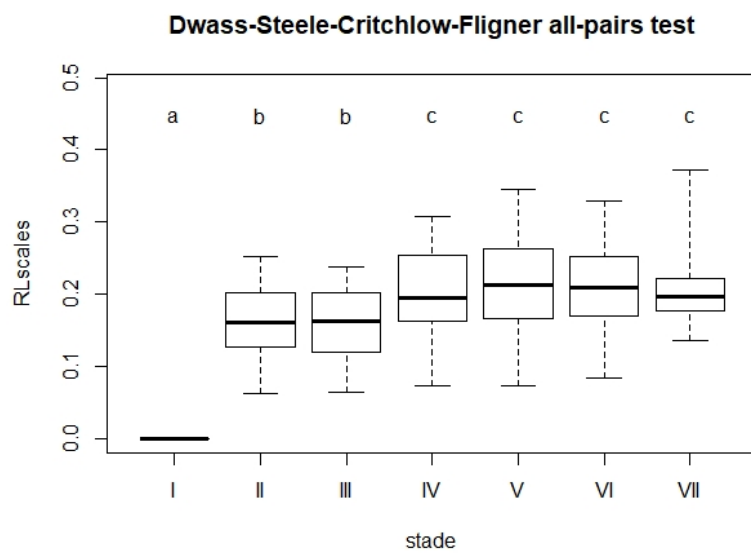

(d)

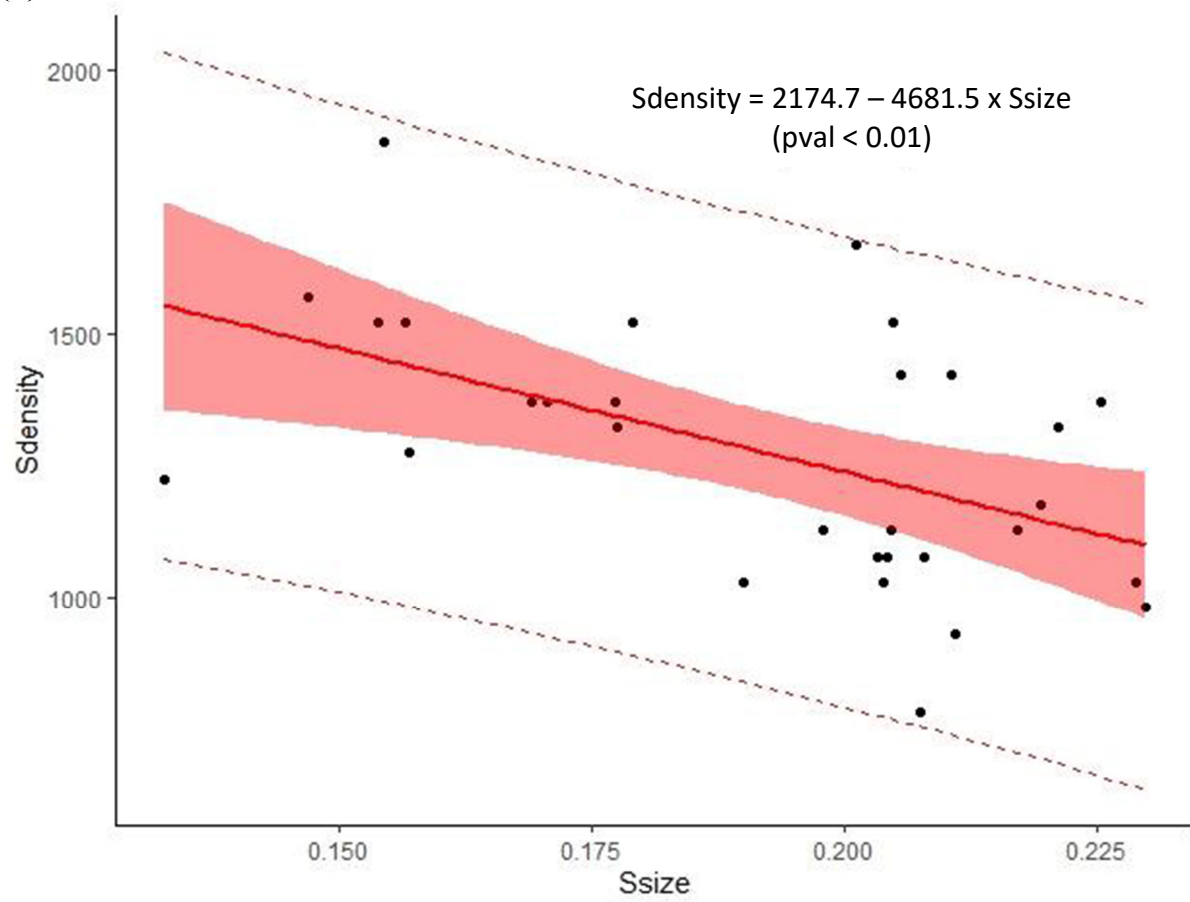

Supplement: s1 [file s1]
