# Supplementary material
Source: MDPI journal article supplement (https://www.mdpi.com/1424-2818/14/12/1100)

**Supplementary Figure S1.** Immunohistological control. (a) immunodetection test with anti-encephalopsin in *S. aliae* retina. (b) immunodetection test with primary antibody omission in *S. aliae* retina. (c) immunodetection test with primary antibody omission in photogenic ventral skin presenting photophore of *S. aliae*. All sections are illustrated in fluorescence and bright light microscopy.

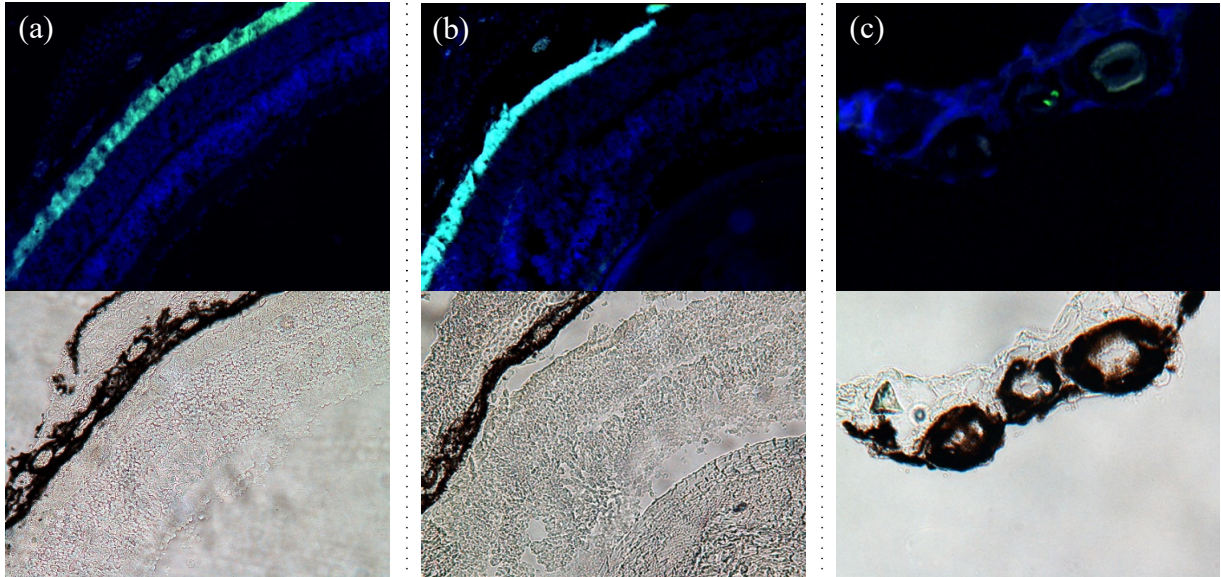

Supplement: s1 [file s1]
